# Supplementary material
Source: Springer Nature journal article supplement (https://www.springermedizin.de/resource/supplementary/13075_2011_3538_MOESM6_ESM.pdf/9694642)

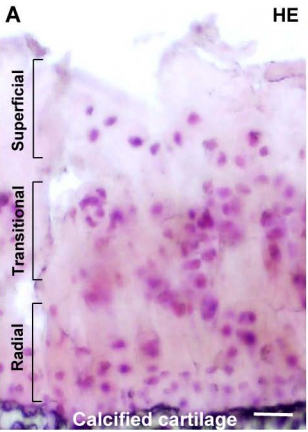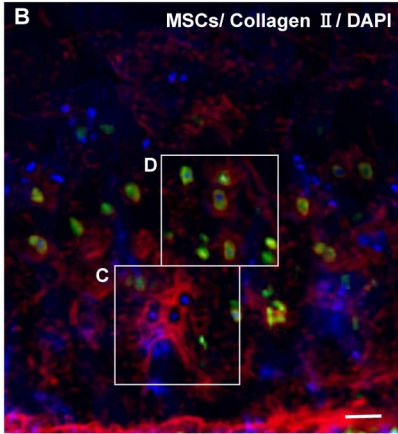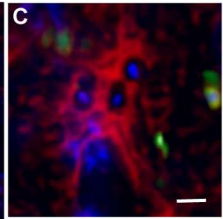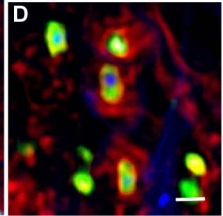

Supplement: MOESM6 [file 9694642]
